# Supplementary material for: Daphnane diterpenes inhibit the metastatic potential of B16F10 murine melanoma cells in vitro and in vivo
Source: Springer Nature journal article supplement (doi:10.1186/s12885-018-4693-y), 2018-08-29
Supplement: MOESM1 [file 16082322]

**Table S1.** Weekly weight measurements of all mice groups from day 1 to 21.

| <b>Treatment</b> | <b>Day 1</b> | <b>Day 7</b> | <b>Day 14</b> | <b>Day 21</b> |
|------------------|--------------|--------------|---------------|---------------|
| (-) B16F10       | 21.0 ± 1.00  | 21.7 ± 1.16  | 22.2 ± 0.96   | 22.7 ± 0.86   |
| + B16F10         | 21.0 ± 0.79  | 21.4 ± 0.74  | 22.1 ± 0.82   | 21.3 ± 1.68   |
| + B16F10/+ TH    | 20.9 ± 0.48  | 21.4 ± 0.74  | 22.1 ± 0.69   | 21.3 ± 1.91   |
| +B16F10/+ DTIC   | 21.1 ± 0.90  | 21.7 ± 1.10  | 22.1 ± 0.86   | 22.1 ± 1.06   |
